# Supplementary material
Source: publisher site journal article supplement (https://www.dovepress.com/article/317682)
Supplement: Supplementary file 1 [file get_supplementary_file.php]

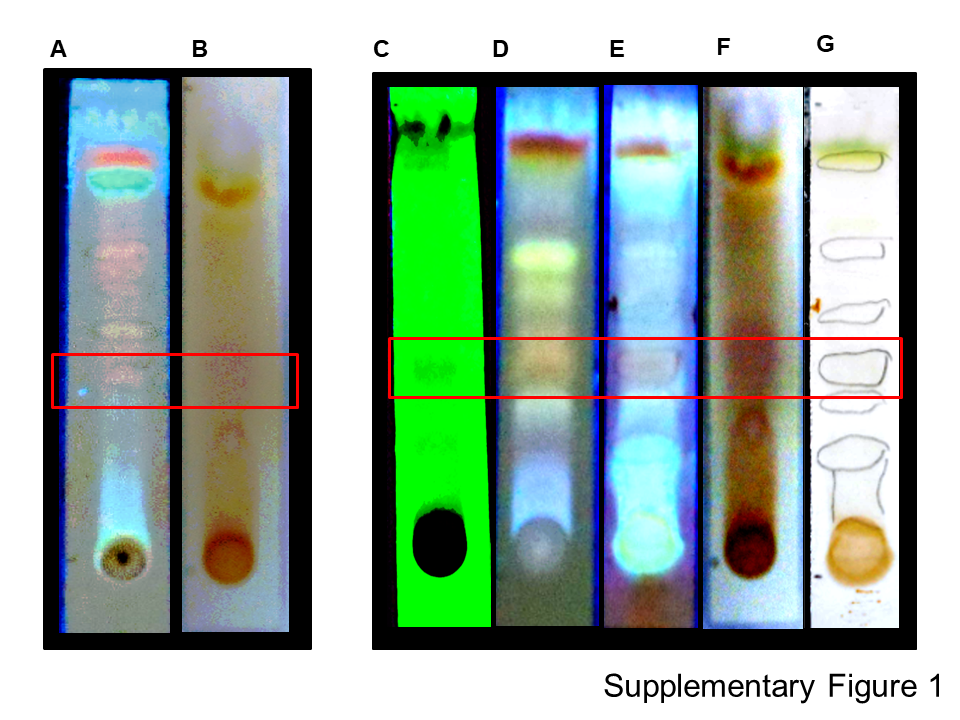


**Supplementary Figure 1.** TLC pattern of *A. muricata* L. with solvent *n*-hexane:ethyl Acetate (2:8). (A) TLC pattern of acetogenin compounds on *A. muricata* L. extract of with solvent *n*-hexane:ethyl acetate (2:8) sprayed with 1% AlCl3 on UV366 and (B) in visible light after sprayed with reagent Ehrlich. TLC pattern of acetogenin compound on *A. muricata* L. ethyl acetate fraction with solvent *n*-hexane:ethyl acetate (2:8) under (C) UV254 light, (D) UV366 light, (E) UV366 after sprayed with AlCl3 (F) visible light after sprayed with reagent Ehrlich, and (G) visual light. Acetogenin is thought to be detectable in Rf = 0.4 (in the red box).

Supplementary Table 1. Results of Thin Layer Ethanol Chromatography Extract of *A. muricata* L. and ethyl acetate with solvent ratio *n*-hexane:ethyl acetate (2:8).

| Sample | No | Rf | visualization | | | | |
| --- | --- | --- | --- | --- | --- | --- | --- |
| Visible light | UV 254 nm | UV  366 nm | AlCl3 1% | Ehrlich |
| Extract | 1. | 0.4 | - | - | red-orange | pink-red |  |
| 2. | 0.5 | - | - | yellow-orange | yellow |  |
| 3. | 0.6 | - | - | orange-brown | orange |  |
| 4. | 0.7 | - | - | orange | orange |  |
| 5. | 0.84 | - | - | green | green-yellow |  |
| Ethyl acetate fraction | 1 | 0.24 | - | - | blue | yellow-green | orange-brown |
| 2 | 0.36 | - | - | yellow | yellow-green | - |
| 3 | 0.4 | - | - | red-orange | pink-red | pink |
| 4 | 0.52 | - | - | orange | yellow | - |
| 5 | 0.68 | - | - | yellow-green | yellow-green | green-yellow |
| 6 | 0.9 | - | - | orange | green-yellow | green-yellow |

Supplementary Table 2. IC50 values 48 h of *A. muricata* leaves extract, and ethyl acetate fraction on A549 lung cancer and HeLa cervical cancer cells.

| Sample | IC50 (µg/ml) | |
| --- | --- | --- |
| A549 | HeLa |
| Extract | 3.90 | 5.33 |
| Ethyl acetate fraction | 3.99 | 5.98 |
